# Supplementary material for: Chemical space analysis and property prediction for carbon capture solvent molecules
Source: Royal Society of Chemistry journal article supplement (doi:10.1039/d3dd00073g), 2024-01-01
Supplement: d3dd00073g1.pdf [file d3dd00073g1.pdf]

## Supporting Information - Chemical Space Analysis and Property Prediction for Carbon Capture Amine molecules

James L. McDonagh, Stamatia Zavitsanou, Alexander Harrison, Dimitry Zubarev,  
Theodore van Kessel, Benjamin H. Wunsch and Flaviu Cipcigan  
flaviu.cipcigan@ibm.com, james.mcdonagh@serna.bio

December 29, 2023

### 1 Unit Conversions

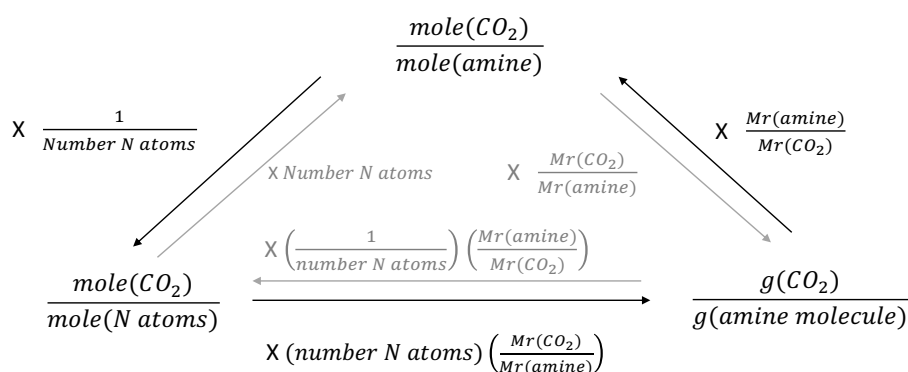

Figure 1: The conversion factors used in this work to move between common capacity measurement units.

Where units were given that need knowledge of the solution density for converting, such as  $\frac{g(\text{CO}_2)}{L(\text{solution})}$ , the following was used assuming the density (were not given) was that of water, and therefore has a density of 1 g/ml.

$$\text{capacity} \times \frac{1}{\text{amine weight fraction} \times 1000} \times \frac{\text{Mr}(\text{amine})}{\text{Mr}(\text{CO}_2)} = \frac{\text{mol}(\text{CO}_2)}{\text{mol}(\text{amine})} \quad (1)$$



Table 1: Experimental data and data set for 98 amine molecules tested for carbon capture

| Index | IUPAC Name                                                                                             | InChIKey                     | Absorption<br>$\left(\frac{\text{moles CO}_2}{\text{moles amine}}\right)$ | capacity | Observed<br>$\left(\frac{\text{moles CO}_2}{\text{moles amine} \cdot \text{sec}}\right)$ | initial<br>rate |
|-------|--------------------------------------------------------------------------------------------------------|------------------------------|---------------------------------------------------------------------------|----------|------------------------------------------------------------------------------------------|-----------------|
| 68    | piperidin-3-ol                                                                                         | BIWOSRSDCZIFM-UHFFFAOYSA-N   | 0.28                                                                      |          | 0.29                                                                                     |                 |
| 69    | 2-(aminomethyl)aniline                                                                                 | GVQYKJPMUUIXBS-UHFFFAOYSA-N  | 0.28                                                                      |          | 0.17                                                                                     |                 |
| 70    | 2-pyridin-4-ylethylamine                                                                               | IDLHTECVNDEOY-UHFFFAOYSA-N   | 0.26                                                                      |          | 0.27                                                                                     |                 |
| 71    | 1-amino-2-methylpropan-2-ol                                                                            | LXQMHOKEXZETKB-UHFFFAOYSA-N  | 0.26                                                                      |          | 0.17                                                                                     |                 |
| 72    | 2-[2-hydroxyethyl(methyl)amino]ethanol                                                                 | CRVGTESFCXCCTH-UHFFFAOYSA-N  | 0.24                                                                      |          | 0.00                                                                                     |                 |
| 73    | 1-[bis(2-hydroxyethyl)amino]propan-2-ol                                                                | ZFECCLNALLETDE-UHFFFAOYSA-N  | 0.22                                                                      |          | 0.00                                                                                     |                 |
| 74    | 2-[bis(2-hydroxyethyl)amino]ethanol                                                                    | GSEJCLTVZPLZKY-UHFFFAOYSA-N  | 0.20                                                                      |          | 0.05                                                                                     |                 |
| 75    | pyrazin-2-ylmethanamine                                                                                | HQIBSDCOMQYSPF-UHFFFAOYSA-N  | 0.19                                                                      |          | 0.09                                                                                     |                 |
| 76    | 2-(1H-imidazol-5-yl)ethanamine                                                                         | NTYJJOPPIAHURM-UHFFFAOYSA-N  | 0.17                                                                      |          | 0.24                                                                                     |                 |
| 77    | 2-[4-(2-hydroxyethyl)piperazin-1-yl]ethanol                                                            | VARKICWTYBUWNT-UHFFFAOYSA-N  | 0.11                                                                      |          | 0.03                                                                                     |                 |
| 78    | (2S)-2-amino-3-methyl-3-sulfanylbutanoic acid                                                          | VVNCNSJFMFPHL-VKHMVHEASA-N   | 0.09                                                                      |          | 0.00                                                                                     |                 |
| 79    | piperidin-1-amine                                                                                      | LWMPFIOTEAXAGV-UHFFFAOYSA-N  | 0.07                                                                      |          | 0.09                                                                                     |                 |
| 80    | 1H-imidazol-5-ylmethanol                                                                               | QDYTUZCWBVJRHKK-UHFFFAOYSA-N | 0.07                                                                      |          | 0.00                                                                                     |                 |
| 81    | 2-morpholin-4-ylethanol                                                                                | KKPDCBRMNSAAW-UHFFFAOYSA-N   | 0.07                                                                      |          | 0.04                                                                                     |                 |
| 82    | 2-[3-[[1,3-dihydroxy-2-(hydroxymethyl)propan-2-yl]amino]propylamino]-2-(hydroxymethyl)propane-1,3-diol | HHKZCCWKTZRCCCL-UHFFFAOYSA-N | 0.06                                                                      |          | 0.15                                                                                     |                 |
| 83    | N-(2-hydroxyethyl)acetamide                                                                            | PVCJKHHOXFKFRP-UHFFFAOYSA-N  | 0.05                                                                      |          | 0.23                                                                                     |                 |
| 84    | 1-pyridin-3-yl-N-(pyridin-3-ylmethyl)methanamine                                                       | FEBQXMFOLRYSGC-UHFFFAOYSA-N  | 0.05                                                                      |          | 0.17                                                                                     |                 |
| 85    | tert-butyl N-(2-hydroxyethyl)carbamate                                                                 | GPTXCAZYUMDUMN-UHFFFAOYSA-N  | 0.04                                                                      |          | 0.27                                                                                     |                 |
| 86    | (2S)-2,5-diamino-5-oxopentanoic acid                                                                   | ZDXPRJPNDDTMRX-VKHMVHEASA-N  | 0.03                                                                      |          | 0.00                                                                                     |                 |
| 87    | pyridazin-3-amine                                                                                      | LETVJWLJLJADE-UHFFFAOYSA-N   | 0.02                                                                      |          | 0.38                                                                                     |                 |
| 88    | propanediamide                                                                                         | WRIRWRKPLXCTFD-UHFFFAOYSA-N  | 0.02                                                                      |          | 0.17                                                                                     |                 |
| 89    | N-(2-sulfanyylethyl)acetamide                                                                          | AXFZADXLXIXTO-UHFFFAOYSA-N   | 0.02                                                                      |          | 0.00                                                                                     |                 |
| 90    | 1,3-oxazolidin-2-one                                                                                   | IZXIZTKNFFYFOF-UHFFFAOYSA-N  | 0.02                                                                      |          | 0.07                                                                                     |                 |
| 91    | N,N-diethylhydroxylamine                                                                               | FVCOIAYSJZGECG-UHFFFAOYSA-N  | 0.01                                                                      |          | 0.00                                                                                     |                 |
| 92    | 1,4-diazabicyclo[2.2.2]octane                                                                          | IMNIMPZHVRPE-UHFFFAOYSA-N    | 0.01                                                                      |          | 0.00                                                                                     |                 |
| 93    | pyridin-2-amine                                                                                        | ICSNLGPSSRYBMBD-UHFFFAOYSA-N | 0.01                                                                      |          | 0.08                                                                                     |                 |
| 94    | 1,3,5,7-tetraazatricyclo[3.3.1.1 <sup>3,7</sup> ]decane                                                | VKYKSIONXSXAKP-UHFFFAOYSA-N  | 0.01                                                                      |          | 0.08                                                                                     |                 |
| 95    | 2-aminoethyl dihydrogen phosphate                                                                      | SUHOOOKUPISOBE-UHFFFAOYSA-N  | 0.01                                                                      |          | 0.05                                                                                     |                 |
| 96    | pyrrol-1-amine                                                                                         | YNZAFFENDLJQG-UHFFFAOYSA-N   | 0.01                                                                      |          | 0.00                                                                                     |                 |
| 97    | pyrazin-2-amine                                                                                        | XFTQRUTUGRCSGO-UHFFFAOYSA-N  | 0.01                                                                      |          | 0.00                                                                                     |                 |



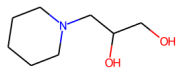

1) 3-piperidin-1-ylpropane-1,2-diol

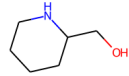

2) piperidin-2-ylmethanol

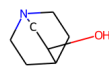

3) 1-azabicyclo[2.2.2]octan-3-ol

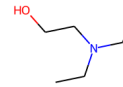

4) 2-(diethylamino)ethanol

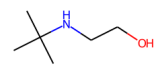

5) 2-(tert-butylamino)ethanol

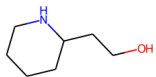

6) 2-piperidin-2-ylethanol

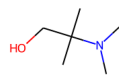

7) 2-(dimethylamino)-2-methylpropan-1-ol

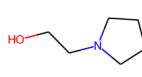

8) 2-pyrrolidin-1-ylethanol

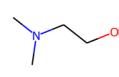

9) 2-(dimethylamino)ethanol

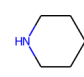

10) piperidine

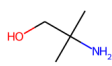

11) 2-amino-2-methylpropan-1-ol

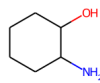

12) 2-aminocyclohexan-1-ol

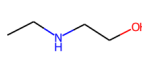

13) 2-(ethylamino)ethanol

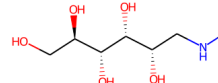

14) (2R,3R,4R,5S)-6-(methylamino)hexane-1,2,3,4,5-pentol

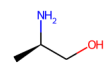

15) (2R)-2-aminopropan-1-ol

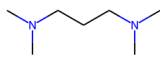

16) N,N,N,N-tetramethylpropane-1,3-diamine

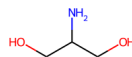

17) 2-aminopropane-1,3-diol

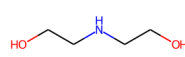

18) 2-(2-hydroxyethylamino)ethanol

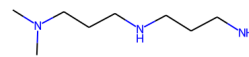

19) N-[3-(dimethylamino)propyl]propane-1,3-diamine

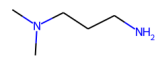

20) N,N-dimethylpropane-1,3-diamine

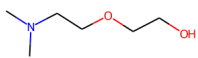

21) 2-[2-(dimethylamino)ethoxy]ethanol

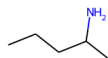

22) pentan-2-amine

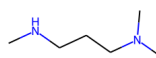

23) N,N,N-trimethylpropane-1,3-diamine

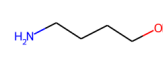

24) 4-aminobutan-1-ol

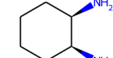

25) (1S,2R)-cyclohexane-1,2-diamine

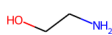

26) 2-aminoethanol

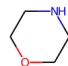

27) morpholine

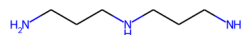

28) N-(3-aminopropyl)propane-1,3-diamine

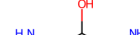

29) 1,3-diaminopropan-2-ol

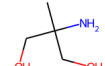

30) 2-amino-2-methylpropane-1,3-diol

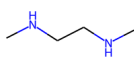

31) N,N-dimethylethane-1,2-diamine

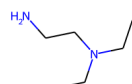

32) N,N-diethylethane-1,2-diamine

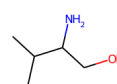

33) 2-amino-3-methylbutan-1-ol

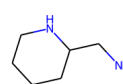

34) piperidin-2-ylmethanamine

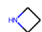

35) azetidine

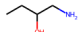

36) 1-aminobutan-2-ol

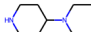

37) NN-diethylpiperidin-4-amine

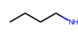

38) butan-1-amine

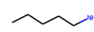

39) pentan-1-amine

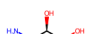

40) (2R)-3-aminopropane-1,2-diol

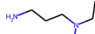

41) NN-diethylpropane-1,3-diamine

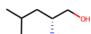

42) (2R)-2-amino-4-methylpentan-1-ol

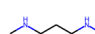

43) NN-dimethylpropane-1,3-diamine

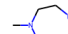

44) 1-methyl-1,4-diazepane

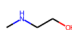

45) 2-(methylamino)ethanol

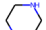

46) piperazine

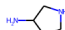

47) pyrrolidin-3-amine

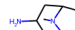

48) 8-methyl-8-azabicyclo[3.2.1]octan-3-amine

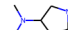

49) NN-dimethylpyrrolidin-3-amine

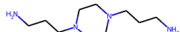

50) 3-[4-(3-aminopropyl)piperazin-1-yl]propan-1-amine

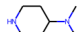

51) NN-dimethylpiperidin-4-amine

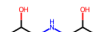

52) 1-(2-hydroxypropylamino)propan-2-ol

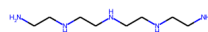

53) N-(2-[(2-(2-aminoethylamino)ethylamino)ethyl]ethane-1,2-diamine

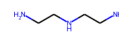

54) N-(2-aminoethyl)ethane-1,2-diamine

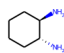

55) (1R,2R)-cyclohexane-1,2-diamine

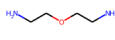

56) 2-(2-aminoethoxy)ethanamine

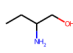

57) 2-aminobutan-1-ol

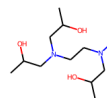

58) 1-(2-[(2-(2-hydroxypropylamino)ethyl-(2-hydroxypropylamino)propan-2-ol

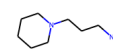

59) 3-piperidin-1-ylpropan-1-amine

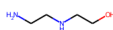

60) 2-(2-aminoethylamino)ethanol

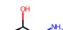

61) (2R)-1-aminopropan-2-ol

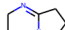

62) 2,3,4,6,7,8-hexahydro-1,2-a]pyrimidine

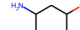

63) 3-aminocyclohexan-1-ol

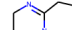

64) 2,3,4,6,7,8,9,10-octahydro-1,2-a]azepine

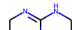

65) 3,4,6,7,8,9-hexahydro-2H-pyrimido[1,2-a]pyrimidine

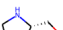

66) [(2S)-pyrrolidin-2-yl]methanol

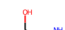

67) (2S)-1-aminopropan-2-ol

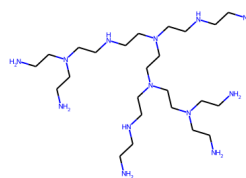

68) 1-(2-[(2-(2-aminoethylamino)ethylamino)ethyl]ethane-1,2-diamine

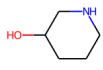

69) piperidin-3-ol

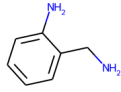

70) 2-(aminomethyl)aniline

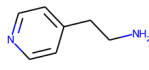

71) 2-pyridin-4-ylethanamine

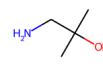

72) 1-amino-2-methylpropan-2-ol

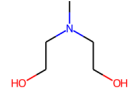

73) 2-[2-(2-hydroxyethyl)(methylamino)ethyl]ethanol

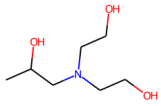

74) 1-[bis(2-hydroxyethyl)amino]propan-2-ol

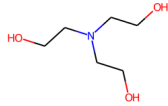

75) 2-[bis(2-hydroxyethyl)amino]ethanol

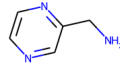

76) pyrazin-2-ylmethanamine

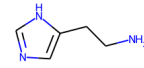

77) 2-(1H-imidazol-5-yl)ethanamine

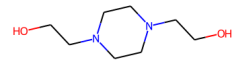

78) 2-[4-(2-hydroxyethyl)piperazin-1-yl]ethanol

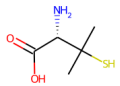

79) (2S)-2-amino-3-methyl-3-sulfanybutanoic acid

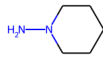

80) piperidin-1-amine

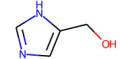

81) 1H-imidazol-5-ylmethanol

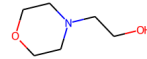

82) 2-morpholin-4-ylethanol

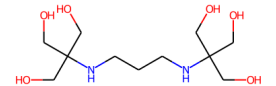

83) 2-[2-(1,3-dihydroxy-2-hydroxymethyl)propen-2-ylamino]propanoic acid

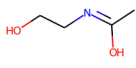

84) N-(2-hydroxyethyl)acetamide

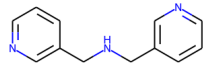

85) 1-pyridin-3-yl-N-(pyridin-3-ylmethyl)methanamine

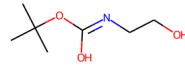

86) tert-butyl N-(2-hydroxyethyl)carbamate

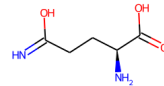

87) (2S)-2,5-diamino-5-oxopentanoic acid

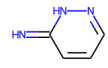

88) pyridazin-3-amine

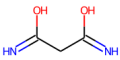

89) propanediamide

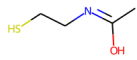

90) N-(2-sulfanyethyl)acetamide

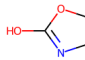

91) 1,3-oxazolidin-2-one

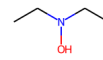

92) NN-diethylhydroxylamine

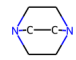

93) 1,4-diazabicyclo[2.2.2]octane

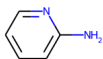

94) pyridin-2-amine

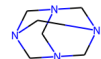

95) 1,3,5,7-tetraazatricyclo[3.3.1.1]decane

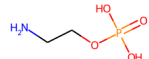

96) 2-aminoethyl hydrogen phosphate

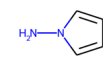

97) pyrrol-1-amine

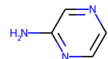

98) pyrazin-2-amine



### 3 Metrics for classification

The false positive rate (false alarm rate) is calculated as the number of false positives divided by the sum of the number of false positives and the number of true negatives, (Eq.2) and it summarizes how often a positive class is predicted when the actual outcome is negative.

$$\text{False Positive Rate} = \frac{\text{False Positives}}{(\text{False Positives} + \text{True Negatives})} \quad (2)$$

The ROC plot is a useful tool because the curves of different models can be compared directly or indirectly for different thresholds. Also, the area under the curve (AUC) can be used as a summary of the model skill. The shape of the curve contains information about the expected false positive rate, and the false negative rate. Smaller values on the x-axis of the plot indicate lower false positives and higher true negatives, and larger values on the y-axis of the plot indicate higher true positives and lower false negatives. Generally, a model is considered predictive when the curves are shown on the top left of the plot. A perfect model is represented by a line that travels from the bottom left of the plot to the top left and then across the top to the top right and has an AUC of 1. A less predictive classifier is one that cannot discriminate between the classes and would predict a random class or a constant class in all cases. Such a model is represented by a diagonal line from the bottom left of the plot to the top right and has an AUC of 0.5.

Sensitivity is calculated as the ratio of the number of true positives divided by the sum of the true positives and the false negatives (Eq.3), and specificity is calculated as the ratio of the number of true negatives divided by the sum of true negatives and false positives (Eq.4).

$$\text{Sensitivity} = \frac{\text{True Positives}}{(\text{True Positives} + \text{False Negatives})} \quad (3)$$

$$\text{Specificity} = \frac{\text{True Negatives}}{(\text{True Negatives} + \text{False Positives})} \quad (4)$$

Matthews Correlation Coefficient shows the correlation between observed and predicted values and is calculated from Eq.5. It returns a value between -1 and 1. A coefficient of 1 represents a perfect prediction and 0 no better than random prediction. Everything above 0.5 is considered a good correlation.

$$MCC = \frac{(TP \times TN - FP \times FN)}{\sqrt{(TP + FP)(TP + FN)(TN + FP)(TN + FN)}} \quad (5)$$

Lastly, geometric mean (g-mean) is the geometric mean of the sensitivity and specificity,<sup>1</sup> this provides a measure of the combined performance of a model for both sensitivity and specificity (Eq.6).

$$\text{g-mean} = \sqrt{\text{sensitivity} \times \text{specificity}} \quad (6)$$



Table 2: Substructure in the ecs fingerprint

| Indexes | Search |
|---------|--------|
| 69      | [#16]  |
| 70      | [+]    |
| 71      | [-]    |

## 5 Occurrence of fingerprint bits in datasets (fingerprint version 1)

### 5.1 ZINC dataset

Table 3: Fingerprint SMARTS bit number of occurrence over the ZINC dataset.

| Bit                                                       | Occurrences |
|-----------------------------------------------------------|-------------|
| ammonia                                                   | 0           |
| primary amine                                             | 1666        |
| secondary amine                                           | 3061        |
| tertiary amine                                            | 1908        |
| quaternary N                                              | 3           |
| imine                                                     | 128         |
| nitrogen bonded to carbon                                 | 11725       |
| aromatic N sp2                                            | 7713        |
| carboxylic acid                                           | 3131        |
| primary alcohol                                           | 1424        |
| secondary alcohol                                         | 756         |
| tertiary alcohol                                          | 58          |
| t butyl                                                   | 85          |
| carbonyl                                                  | 4465        |
| halocarbon                                                | 5095        |
| benezene ring                                             | 5827        |
| 6 member aromatic c and n ring                            | 9410        |
| 6 member c and o ring                                     | 272         |
| 5 c ring                                                  | 121         |
| 5 member aromatic c and n ring                            | 2434        |
| 5 member c and o ring                                     | 272         |
| Cyclohexane                                               | 242         |
| Cyclohexylamine                                           | 472         |
| Aniline                                                   | 164         |
| benzylamine                                               | 99          |
| piperidine                                                | 839         |
| pyridine                                                  | 2880        |
| pyrrole                                                   | 339         |
| primary amino alcohol two carbon separation               | 58          |
| secondary amino alcohol two carbon separation             | 100         |
| tertiary amino alcohol two carbon separation              | 486         |
| primary amino alcohol three carbon separation             | 37          |
| secondary amino alcohol three carbon separation           | 58          |
| tertiary amino alcohol three carbon separation            | 295         |
| aliphatic primary amino alcohol two carbon separation     | 53          |
| aliphatic secondary amino alcohol two carbon separation   | 75          |
| aliphatic tertiary amino alcohol two carbon separation    | 310         |
| aliphatic primary amino alcohol three carbon separation   | 22          |
| aliphatic secondary amino alcohol three carbon separation | 28          |

Continued on next page

Table 3: Fingerprint SMARTS bit number of occurrence over the ZINC dataset.

| Bit                                                      | Occurrences |
|----------------------------------------------------------|-------------|
| aliphatic tertiary amino alcohol three carbon separation | 83          |
| primary amine one carbon aromatic group                  | 429         |
| primary amine two carbon aromatic group                  | 263         |
| primary amine three carbon aromatic group                | 33          |
| secondary amine one carbon aromatic group                | 1051        |
| secondary amine two carbon aromatic group                | 249         |
| secondary amine three carbon aromatic group              | 88          |
| tertiary amine one carbon aromatic group                 | 1578        |
| tertiary amine two carbon aromatic group                 | 119         |
| tertiary amine three carbon aromatic group               | 40          |
| methyl branch one carbon from a N atom                   | 121         |
| methyl branch two carbon from a N atom                   | 82          |
| methyl branch three carbon from a N atom                 | 24          |
| methyl branch four carbon from a N atom                  | 11          |
| methyl branch five carbon from a N atom                  | 0           |
| methyl branch six carbon from a N atom                   | 2           |
| ethyl chain                                              | 5605        |
| propyl chain                                             | 2251        |
| butyl chain                                              | 680         |
| pentyl chain                                             | 200         |
| hexyl chain                                              | 66          |
| poly primary and or secondary amine                      | 362         |
| poly primary and or secondary and or tertiary amine      | 1154        |
| poly alcohol                                             | 166         |
| pyrazine aliphatic C 2 and 5 substitution                | 5           |
| pyridine aliphatic C 2 and 5 substitution                | 40          |
| pyridine aliphatic C 2 substitution                      | 478         |
| Presence of Boron                                        | 136         |
| Presence of Silicon                                      | 26          |
| Presence of Phosphorus                                   | 10          |
| Presence of Sulphur                                      | 1708        |
| positive charge group                                    | 805         |
| negative charge group                                    | 562         |

## 5.2 CCS literature datasets

Table 4: Fingerprint SMARTS bit number of occurrence over the ZINC dataset.

| Bit           | Occurrences |
|---------------|-------------|
| ammonia       | 0           |
| primary amine | 60          |

Continued on next page

Table 4: Fingerprint SMARTS bit number of occurrences over the ZINC dataset

| Bit                                                       | Occurrences |
|-----------------------------------------------------------|-------------|
| secondary amine                                           | 45          |
| tertiary amine                                            | 41          |
| quaternary N                                              | 0           |
| imine                                                     | 0           |
| nitrogen bonded to carbon                                 | 128         |
| aromatic N sp2                                            | 18          |
| carboxylic acid                                           | 5           |
| primary alcohol                                           | 60          |
| secondary alcohol                                         | 14          |
| tertiary alcohol                                          | 0           |
| t butyl                                                   | 0           |
| carbonyl                                                  | 5           |
| halocarbon                                                | 0           |
| benezene ring                                             | 0           |
| 6 member aromatic c and n ring                            | 17          |
| 6 member c and o ring                                     | 1           |
| 5 c ring                                                  | 1           |
| 5 member aromatic c and n ring                            | 1           |
| 5 member c and o ring                                     | 1           |
| Cyclohexane                                               | 4           |
| Cyclohexylamine                                           | 4           |
| Aniline                                                   | 0           |
| benzylamine                                               | 0           |
| piperidine                                                | 6           |
| pyridine                                                  | 13          |
| pyrrole                                                   | 0           |
| primary amino alcohol two carbon separation               | 9           |
| secondary amino alcohol two carbon separation             | 14          |
| tertiary amino alcohol two carbon separation              | 24          |
| primary amino alcohol three carbon separation             | 2           |
| secondary amino alcohol three carbon separation           | 2           |
| tertiary amino alcohol three carbon separation            | 10          |
| aliphatic primary amino alcohol two carbon separation     | 9           |
| aliphatic secondary amino alcohol two carbon separation   | 14          |
| aliphatic tertiary amino alcohol two carbon separation    | 24          |
| aliphatic primary amino alcohol three carbon separation   | 1           |
| aliphatic secondary amino alcohol three carbon separation | 2           |
| aliphatic tertiary amino alcohol three carbon separation  | 6           |
| primary amine one carbon aromatic group                   | 3           |
| primary amine two carbon aromatic group                   | 0           |
| primary amine three carbon aromatic group                 | 1           |
| secondary amine one carbon aromatic group                 | 6           |
| secondary amine two carbon aromatic group                 | 0           |

Continued on next page

Table 4: Fingerprint SMARTS bit number of occurrences over the ZINC dataset

| Bit                                                 | Occurrences |
|-----------------------------------------------------|-------------|
| secondary amine three carbon aromatic group         | 0           |
| tertiary amine one carbon aromatic group            | 0           |
| tertiary amine two carbon aromatic group            | 0           |
| tertiary amine three carbon aromatic group          | 0           |
| methyl branch one carbon from a N atom              | 6           |
| methyl branch two carbon from a N atom              | 6           |
| methyl branch three carbon from a N atom            | 1           |
| methyl branch four carbon from a N atom             | 1           |
| methyl branch five carbon from a N atom             | 2           |
| methyl branch six carbon from a N atom              | 0           |
| ethyl chain                                         | 89          |
| propyl chain                                        | 44          |
| butyl chain                                         | 24          |
| pentyl chain                                        | 11          |
| hexyl chain                                         | 2           |
| poly primary and or secondary amine                 | 36          |
| poly primary and or secondary and or tertiary amine | 49          |
| poly alcohol                                        | 23          |
| pyrazine aliphatic C 2 and 5 substitution           | 1           |
| pyridine aliphatic C 2 and 5 substitution           | 1           |
| pyridine aliphatic C 2 substitution                 | 4           |
| Presence of Boron                                   | 0           |
| Presence of Silicon                                 | 0           |
| Presence of Phosphorus                              | 0           |
| Presence of Sulphur                                 | 0           |
| positive charge group                               | 0           |
| negative charge group                               | 0           |

## 6 Mordred features

We find 35 correlating features which have a significant p-value at 95%, shown in table 5. Following feature generation, we apply one-hot encoding for categorical features and min-max scaling for continuous features. There were 6 features (nBondsM, nBondsKD, C1SP2, HybRatio, FCSP3, ETA\_beta\_ns) considered as categorical out of the 35. Categorical in this case includes features with specific increments such as counts. Following one hot encoding the feature set extends to 84 as every unique value of the categorical features becomes a binary feature array.

Table 5: Features used as descriptors in the Mordred models based on Spearman correlation of  $\geq 0.5$  cutoff and significance at 95% on a two tail p-test of the Spearman correlation.

| Index | Descriptor name |
|-------|-----------------|
| 0     | ATS2dv          |
| 1     | AATS0dv         |
| 2     | AATS1dv         |
| 3     | AATS2dv         |
| 4     | AATS0Z          |
| 5     | AATS1Z          |
| 6     | AATS2Z          |
| 7     | AATS0m          |
| 8     | AATS1m          |
| 9     | AATS2m          |
| 10    | AATS0v          |
| 11    | AATS1pe         |
| 12    | AATS2pe         |
| 13    | AATSC0dv        |
| 14    | GATS1dv         |
| 15    | GATS1Z          |
| 16    | GATS1m          |
| 17    | BCUTdv-1h       |
| 18    | nBondsM         |
| 19    | nBondsKD        |
| 20    | C1SP2           |
| 21    | HybRatio        |
| 22    | FCSP3           |
| 23    | AXp-2dv         |
| 24    | MZ              |
| 25    | Mm              |
| 26    | Mv              |
| 27    | AETA_beta       |
| 28    | ETA_beta_ns     |
| 29    | AETA_beta_ns    |
| 30    | AETA_eta_F      |
| 31    | ETA_epsilon_1   |
| 32    | PEOE_VSA2       |
| 33    | SlogP_VSA6      |
| 34    | AMW             |



## 7 Extra Trees Accuracy

Table 6: This table shows the headline accuracy results for using the Extra trees classifier. We see that this classifier is consistently the worst performer in 2 of three feature sets hence not included in the main analysis where we have focused on the best performing models.

| Features | Accuracy |
|----------|----------|
| Mordred  | 0.72     |
| MACCS    | 0.79     |
| CCS      | 0.80     |



## 8 SHAP

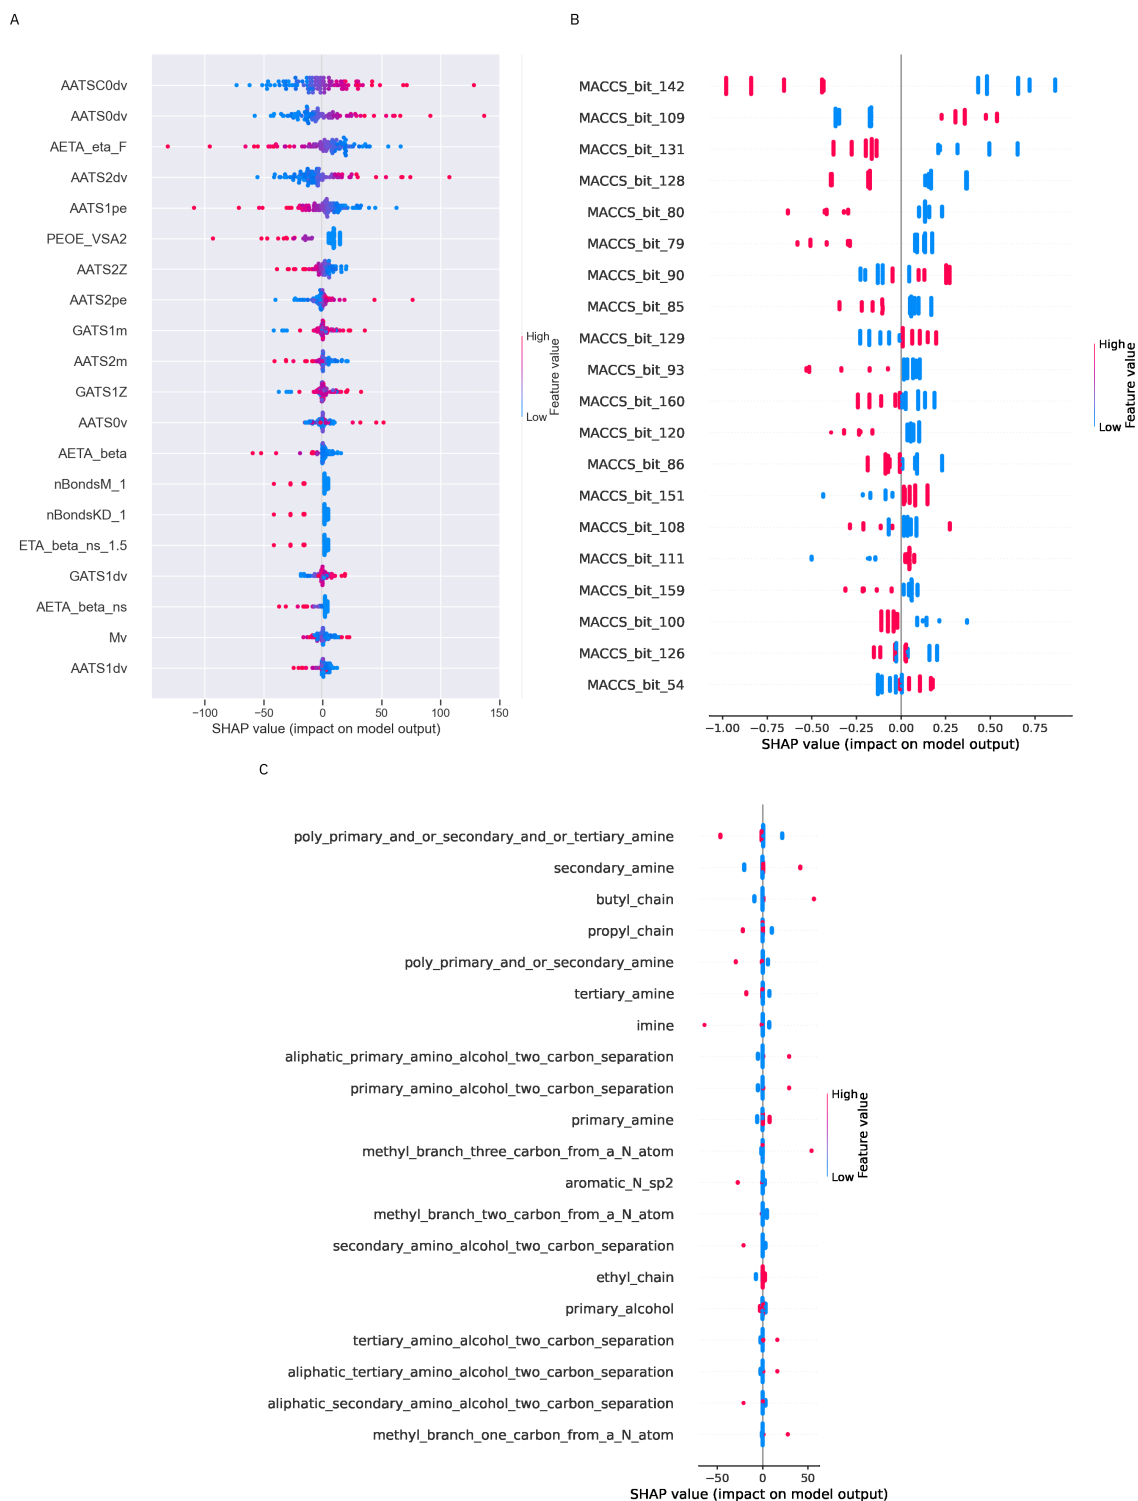

## References

- [1] Q. Zang, D. M. Rotroff and R. S. Judson, *Journal of chemical information and modeling*, 2013, **53**, 3244–3261.
